# Supplementary material
Source: publisher figshare collection journal article supplement (https://gsajournals.figshare.com/ndownloader/files/12231395)
Supplement: Supplementary file 1 [file 12231395]

**Table S1:** Strains generated in this study.

| Strain | Genotype |
| --- | --- |
| SHG630 | *ustIs72(hsp-16.41p::SV40_NLS::Cre::tbb-2 3'UTR)* |
| SHG631 | *best-4(ust78[rps-11p::hygR + LoxP::gfp])* |
| SHG632 | *t10d4.6(ust79[rps-11p::hygR + myo-2p::LoxP::mCherry])* |
| SHG633 | *ustIs70[rps-11p::hygR + LoxP::gfp]* |
| SHG634 | *clec-68(ust80[rps-11p::hygR + myo-2p::LoxP::mCherry])* |
| SHG635 | *ustIs72*; *ustIs71[rps-11p::hygR + LoxP::gfp]* |
| SHG636 | *ustIs72*; *dpy-8(ust81[rps-11ps::hygR + myo-2p::LoxP::mCherry])* |
| SHG637 | *ustIs72*; *best-4(ust78)*; *t10d4.6(ust79)* |
| SHG638 | *ustIs72*; *ustIs70*; *clec-68(ust80)* |
| SHG639 | *ustIs72*; *ustIs71*; *dpy-8(ust81)* |
| SHG666 | *ustIs72*; *ustIn1[best-4;* *t10d4.6]* |
| SHG667 | *ustIs72*; *ustIn2[clec-68]* |
| SHG668 | *ustIs72*; *ustIn3[dpy-8]* |
| SHG669 | *ustIn2[clec-68;dpy-9(ust86)]* |
| SHG676 | *+/ustIn1[best-4;* *t10d4.6] IV* |
| SHG686 | *+/ustIn1[pqn-85(ust85);best-4;* *t10d4.6] II* |
| SHG687 | *+/ustIn2[clec-68;dpy-9(ust86)] IV* |
| SHG688 | *+/ ustIn3[dpy-8] X* |
| SHG753 | W07E6.2*(ust90)/ustIn1[pqn-85(ust85);best-4;* *t10d4.6] II* |
| SHG759 | *ustIn3[dpy-8];ustEx2[dpy-8p::dpy-8;myo-2p::mCherry]* |
